# Supplementary material for: Nickel(ii) monobenzoporphyrins and chlorins: synthesis, electrochemistry and anion sensing properties
Source: Royal Society of Chemistry journal article supplement (doi:10.1039/d1dt03122h), 2021-01-01
Supplement: d1dt03122h1.pdf [file d1dt03122h1.pdf]

# Nickel(II) Monobenzoporphyrins and Chlorins: Synthesis, Electrochemistry and Anion Sensing Properties

*Sandeep Kumar,<sup>†#</sup> Nivedita Chaudhri,<sup>†#</sup> W. Ryan Osterloh<sup>‡</sup>, Karl M. Kadish<sup>\*‡</sup>, and Muniappan*

*Sankar<sup>\*‡</sup>*

<sup>†</sup>Department of Chemistry, Indian Institute of Technology Roorkee, Roorkee 247667, India

<sup>‡</sup>Department of Chemistry, University of Houston, Houston, TX, 77204-5003, USA

| Contents                    |                                                                                                               | Page |
|-----------------------------|---------------------------------------------------------------------------------------------------------------|------|
| <b>Experimental Section</b> |                                                                                                               | 3-8  |
| <b>Figure S1.</b>           | <sup>1</sup> H NMR spectrum of NiMBP(NO <sub>2</sub> ) in CDCl <sub>3</sub> at 298 K.                         | 9    |
| <b>Figure S2.</b>           | <sup>1</sup> H NMR spectrum of NiMBC(IND) <sub>2</sub> in CDCl <sub>3</sub> at 298 K.                         | 10   |
| <b>Figure S3.</b>           | <sup>1</sup> H NMR spectrum of NiMBC(MN) <sub>2</sub> in CDCl <sub>3</sub> at 298 K.                          | 10   |
| <b>Figure S4.</b>           | <sup>1</sup> H NMR spectrum of NiMBC(IND) <sub>2</sub> Br <sub>4</sub> in CDCl <sub>3</sub> at 298 K.         | 11   |
| <b>Figure S5.</b>           | <sup>1</sup> H NMR spectrum of NiMBP(IND) <sub>2</sub> in CDCl <sub>3</sub> at 298 K.                         | 11   |
| <b>Figure S6.</b>           | <sup>1</sup> H NMR spectrum of NiMBP(MN) <sub>2</sub> in CDCl <sub>3</sub> at 298 K.                          | 12   |
| <b>Figure S7.</b>           | <sup>1</sup> H NMR spectrum of NiMBP(VCN) <sub>2</sub> in CDCl <sub>3</sub> at 298 K.                         | 12   |
| <b>Figure S8.</b>           | <sup>13</sup> C NMR spectrum of NiMBP(VCN) <sub>2</sub> in CDCl <sub>3</sub> at 298 K.                        | 13   |
| <b>Figure S9.</b>           | MALDI-TOF-MS spectrum of NiMBC(IND) <sub>2</sub> in CH <sub>2</sub> Cl <sub>2</sub> at 298 K.                 | 13   |
| <b>Figure S10.</b>          | MALDI-TOF-MS spectrum of NiMBC(MN) <sub>2</sub> in CH <sub>2</sub> Cl <sub>2</sub> at 298 K.                  | 14   |
| <b>Figure S11.</b>          | MALDI-TOF-MS spectrum of NiMBP(IND) <sub>2</sub> in CH <sub>2</sub> Cl <sub>2</sub> at 298 K.                 | 14   |
| <b>Figure S12.</b>          | MALDI-TOF-MS spectrum of NiMBP(MN) <sub>2</sub> in CH <sub>2</sub> Cl <sub>2</sub> at 298 K.                  | 15   |
| <b>Figure S13.</b>          | MALDI-TOF-MS spectrum of NiMBC(IND) <sub>2</sub> Br <sub>4</sub> in CH <sub>2</sub> Cl <sub>2</sub> at 298 K. | 15   |
| <b>Figure S14.</b>          | MALDI-TOF-MS spectrum of NiMBP(VCN) <sub>2</sub> in CH <sub>2</sub> Cl <sub>2</sub> at 298 K.                 | 16   |
| <b>Table S1</b>             | Crystallographic and structure refinement data for NiMBP(IND) <sub>2</sub> .                                  | 16   |
| <b>Table S2</b>             | Selected average bond lengths and bond angles of NiMBP(IND) <sub>2</sub> .                                    | 17   |

|                    |                                                                                                                                                                                                                             |    |
|--------------------|-----------------------------------------------------------------------------------------------------------------------------------------------------------------------------------------------------------------------------|----|
| <b>Figure S15.</b> | Cyclic voltammogram comparing the effect of $\beta,\beta'$ -benzo fusion of NiTPP(MN) <sub>2</sub> and NiMBP(MN) <sub>2</sub> in CH <sub>2</sub> Cl <sub>2</sub> containing 0.1 M TBAP at (a) room and (b) low temperature. | 18 |
| <b>Figure S16.</b> | Cyclic voltammogram comparing the effect of $\beta,\beta'$ -benzo fusion of NiTPP(IND) <sub>2</sub> and NiMBP(IND) <sub>2</sub> in CH <sub>2</sub> Cl <sub>2</sub> containing 0.1 M TBAP.                                   | 19 |
| <b>Figure S17.</b> | Cyclic voltammogram of NiMBC(MN) <sub>2</sub> , NiMBC(IND) <sub>2</sub> and NiMBC(IND) <sub>2</sub> Br <sub>4</sub> in CH <sub>2</sub> Cl <sub>2</sub> containing 0.1 M TBAP at low temperature.                            | 19 |
| <b>Figure S18.</b> | UV-Visible spectral changes of (a) NiMBC(MN) <sub>2</sub> with CN <sup>-</sup> ion; (b) NiMBC(IND) <sub>2</sub> Br <sub>4</sub> with CN <sup>-</sup> ion in CH <sub>2</sub> Cl <sub>2</sub> at 298 K.                       | 20 |
| <b>Figure S19.</b> | Comparative UV-Visible spectra of NiMBP(IND) <sub>2</sub> with and without cyanide ion in CH <sub>2</sub> Cl <sub>2</sub> at 298K.                                                                                          | 20 |
| <b>Figure S20.</b> | UV-Vis Spectral Changes of NiMBP(MN) <sub>2</sub> ( $1.08 \times 10^{-5}$ M) upon Addition of 10 eq. of Tested Isocyanate and Isothiocyanate derivatives in CH <sub>2</sub> Cl <sub>2</sub> 298 K                           | 21 |
| <b>Figure S21</b>  | Plot of $\log(A_n - A_0)/(A_f - A_n)$ versus $\log[\text{CN}^-]$ to determine the limit of detection for NiMBP(MN) <sub>2</sub> in CH <sub>2</sub> Cl <sub>2</sub> .                                                        | 22 |
| <b>References</b>  |                                                                                                                                                                                                                             | 22 |

## EXPERIMENTAL SECTION

### Materials

Methyl acrylate, triphenylphosphine, and pyrrole were purchased from Alfa Aesar UK and used as received. DriSolv Anhydrous dichloromethane ( $\text{CH}_2\text{Cl}_2$ ,  $\geq 99.8\%$ ), anhydrous pyridine (99.8%), tetra-n-butyl-ammonium perchlorate (TBAP,  $\geq 99.0\%$ ), palladium acetate, indane-1,3-dione, and liquid bromine, tetrabutylammonium cyanide (TBACN,  $\geq 95.0\%$ ) were purchased from Sigma Aldrich and directly used without further purification. **Caution!** *Perchlorate salts are potentially explosive and should be handled with care.* Benzaldehyde,  $\text{Ni}(\text{OAc})_2 \cdot 4\text{H}_2\text{O}$ ,  $\text{Cu}(\text{NO}_3)_2 \cdot \text{H}_2\text{O}$ , DDQ,  $\text{K}_2\text{CO}_3$ , malononitrile and acetic acid were purchased from Hi-Media, India. All the solvents employed in the present work have been distilled or dried before use. NBS for bromination reaction was recrystallized from hot water and dried for 6-8 h at 70 °C under vacuum. Precoated silica-based TLC plates were purchased from E. Merck. All anions employed in this study are of tetrabutylammonium (TBA) salts which were obtained from Sigma-Aldrich or Alfa Aesar UK. Sodium azide, cyanate, and thiocyanates including 4-nitrophenyl thiocyanate (4-NP(SCN)) and two nitrophenyl isocyanate derivatives, 4-NP(OCN) and 3-NP(OCN) are obtained Alfa Aesar UK.

### Instrumentation and Methods

The electronic absorption spectra were recorded on Agilent Cary 100 spectrophotometer using a pair of quartz cells of 10 mm path length with 3.5 ml volume.  $\lambda_{\text{max}}$  values are reported in nm and molar extinction coefficients ( $\epsilon$ ) are given in  $\text{M}^{-1}\text{cm}^{-1}$ . The emission spectra were recorded on Hitachi F-4600 spectrofluorometer using a quartz cell of 10 mm path length and 3.5 ml volume. The  $^1\text{H}$  NMR spectra were recorded on JEOL ECX 400 MHz using  $\text{CDCl}_3$  as a solvent at 298 K and reported in  $\delta$  scale (ppm) value. The positive ion mode MALDI-TOF-MS spectra were obtained by Bruker UltrafleXtreme-TN MALDI-TOF/TOF spectrometer with 2-(4'-

hydroxyphenylazo)benzoic acid (HABA) as matrix. The geometry optimization of synthesized Ni(II) porphyrinoids in gas phase was carried out by DFT calculations using B3LYP functional and LANL2DZ basis set. The sensing studies were carried out in distilled  $\text{CH}_2\text{Cl}_2$ . Cyclic voltammetry (CV) measurements were carried out using an EG&G model 173 potentiostat/galvanostat coupled with an EG&G model 175 universal programmer, and current/voltage curves were plotted on an EG&G XY plotter in pyridine solutions containing 0.1 M tetrabutylammonium perchlorate (TBAP) as a supporting electrolyte. A three electrode system composed of a glassy carbon working electrode, a platinum wire counter electrode, and a homemade saturated calomel reference electrode (SCE). The SCE reference electrode, tested in  $\text{CH}_2\text{Cl}_2$  against ferrocene (0.48 V vs SCE), was separated from the bulk solution with a fritted glass bridge of low porosity filled with the solvent and supporting electrolyte. All solutions were degassed, and a blanket of  $\text{N}_2$  was kept above the solution during electrochemical measurements. Low temperature CV measurements were made by immersing the cell in an appropriate dry ice/acetone mixture.

**General Procedure for the Synthesis of *trans*-monobenzochlorins NiMBC(IND)<sub>2</sub> and NiMBC(MN)<sub>2</sub>.** 200 mg (0.227 mmol) of NiMBP(NO<sub>2</sub>) was dissolved in 7 ml of DMSO. To this, 10 eq. of K<sub>2</sub>CO<sub>3</sub> and 10 eq. of active methylene compound (malononitrile or indane-1,3-dione) were added and the reaction mixture was purged with argon for 10-15 min. The reaction mixture was stirred at 85 °C for 2.5-3.0 hrs. The completion of the reaction was monitored by thin layer chromatography and UV-visible spectroscopy. After completion, the reaction mixture was cooled to room temperature and diluted with 25 ml CHCl<sub>3</sub>. The diluted reaction mixture was washed twice with brine solution and the organic layer was separated and passed over anhydrous sodium sulphate. The solvent was removed and the crude porphyrin mixture was purified by silica gel column chromatography. Trace of unreacted precursor was removed using CHCl<sub>3</sub> as an eluent and the desired compound was eluted using CHCl<sub>3</sub> to CHCl<sub>3</sub>:acetone (95:5, v/v) mixture. The pure products were obtained by recrystallization utilizing a CHCl<sub>3</sub>/CH<sub>3</sub>OH mixture.

**NiMBC(IND)<sub>2</sub>:** Yield: 76% (194 mg, 0.172 mmol). UV/vis (CH<sub>2</sub>Cl<sub>2</sub>):  $\lambda_{\text{max}}$ (nm) (log  $\epsilon$ ): 230(5.04), 448(5.17), 527(3.96), 612(sh), 659(4.48). <sup>1</sup>H NMR (400 MHz, CDCl<sub>3</sub>)  $\delta$  (ppm): 8.49(d, <sup>3</sup>J<sub>H, H</sub> = 4 Hz, 2H,  $\beta$ -H), 8.31(d, <sup>3</sup>J<sub>H, H</sub> = 4 Hz, 2H,  $\beta$ -H), 7.87-7.74(m, 14H, *meso*-Ph-H), 7.68(d, <sup>3</sup>J<sub>H, H</sub> = 8 Hz, 2H, *meso*-Ph-H), 7.58(t, <sup>3</sup>J<sub>H, H</sub> = 8 Hz, 2H, *meso*-Ph-H), 7.41(d, <sup>3</sup>J<sub>H, H</sub> = 8 Hz, 2H, *meso*-Ph-H), 7.35-7.35(m, 4H, IND-H), 7.22-7.19(m, 4H, IND-H), 6.88(d, <sup>3</sup>J<sub>H, H</sub> = 8 Hz, 2H,  $\beta$ -fused-H), 5.07(d, <sup>3</sup>J<sub>H, H</sub> = 4 Hz, 2H,  $\beta$ -H), 3.84(s, 6H, -CH<sub>3</sub>), 3.00(d, <sup>3</sup>J<sub>H, H</sub> = 4 Hz, 2H, -CH(IND)). MALDI-TOF-MS (*m/z*): found 1127.627 [M+H]<sup>+</sup>, calcd 1127.259, found 1216.322 [M]<sup>+</sup>+THF+H<sub>2</sub>O, calcd 1216.319. Anal. Calcd for C<sub>70</sub>H<sub>44</sub>N<sub>4</sub>O<sub>8</sub>Ni C, 74.55; H, 3.93; N, 4.97. Found C, 74.49; H, 3.90; N, 4.98.

**NiMBC(MN)<sub>2</sub>**: Yield: 70% (154 mg, 0.159 mmol). UV/vis (CH<sub>2</sub>Cl<sub>2</sub>):  $\lambda_{\text{max}}$ (nm) (log  $\epsilon$ ): 267(4.36), 442(5.00), 552(3.42), 662(sh), 651(4.32). <sup>1</sup>H NMR (400 MHz, CDCl<sub>3</sub>)  $\delta$  (ppm): 8.45(d, <sup>3</sup>J<sub>H, H</sub> = 4 Hz, 4H,  $\beta$ -H), 8.27(s, 2H, *meso*-Ph-H), 7.91-7.86 (m, 5H, *meso*-Ph-H), 7.78(t, <sup>3</sup>J<sub>H, H</sub> = 8 Hz, 3H, *meso*-Ph-H), 7.71(t, <sup>3</sup>J<sub>H, H</sub> = 8 Hz, 2H, *meso*-Ph-H), 7.58(s, 2H, *meso*-Ph-H), 7.51(t, <sup>3</sup>J<sub>H, H</sub> = 8 Hz, 2H, *meso*-Ph-H), 7.35(s, 2H, *meso*-Ph-H), 7.18(s, 2H, *meso*-Ph-H), 7.06(d, <sup>3</sup>J<sub>H, H</sub> = 8 Hz, 2H,  $\beta$ -fused-H), 5.04(d, <sup>3</sup>J<sub>H, H</sub> = 4 Hz, 2H,  $\beta$ -H), 3.86-3.83(m, 8H, -CH(MN) & -CH<sub>3</sub>). MALDI-TOF-MS (*m/z*): found 966.218 [M]<sup>+</sup>, calcd 966.221, found 837.306 [M+H]<sup>+</sup>-2MN, calcd 837.201. Anal. Calcd for C<sub>58</sub>H<sub>36</sub>N<sub>8</sub>O<sub>4</sub>Ni C, 71.99; H, 3.75; N, 11.58. Found: C, 72.01; H, 3.76; N, 11.39.

**Synthetic Procedure for Oxidative Fusion of *trans*-monobenzochlorins into Difused monobenzoporphyrins NiMBP(IND)<sub>2</sub> and NiMBP(MN)<sub>2</sub>**. 70 mg of the respective *trans*-monobenzochlorins was treated with 6 eq. of DDQ in 20 ml of distilled CHCl<sub>3</sub>. The reaction mixture was allowed to reflux for 2-3 hrs as the starting material was totally consumed. After completion, the reaction mixture was washed trice with distilled water to remove excess of DDQ. The organic layer was passed through anhydrous sodium sulphate and dried under reduced pressure. The crude porphyrins were purified by silica gel column chromatography using an initial CHCl<sub>3</sub> eluent followed by a 5-7% acetone in CHCl<sub>3</sub> eluent. The final solid product was washed with methanol to afford the pure product(s).

**NiMBP(IND)<sub>2</sub>**: Yield: 69% (48 mg, 0.043 mmol). UV/vis (CH<sub>2</sub>Cl<sub>2</sub>):  $\lambda_{\text{max}}$ (nm) (log  $\epsilon$ ): 229(4.90), 480(5.26), 596(4.28), 664(3.76). <sup>1</sup>H NMR (400 MHz, CDCl<sub>3</sub>)  $\delta$  (ppm): 9.31(d, <sup>3</sup>J<sub>H, H</sub> = 4 Hz, 2H,  $\beta$ -H), 8.72(d, <sup>3</sup>J<sub>H, H</sub> = 4 Hz, 2H,  $\beta$ -H), 8.27(s, 2H, *meso*-Ph-H), 8.04-7.57(m, 16H, *meso*-Ph-H), 7.44(t, <sup>3</sup>J<sub>H, H</sub> = 4 Hz, 3H, IND-H), 7.31(s, 2H, IND-H), 7.01(t, <sup>3</sup>J<sub>H, H</sub> = 8 Hz, 3H, IND-H), 6.78(d, <sup>3</sup>J<sub>H, H</sub> = 8 Hz, 2H, fused-H), 3.87(s, 6H, -CH<sub>3</sub>). MALDI-TOF-MS (*m/z*): found 1122.432 [M+H]<sup>+</sup>,

calcd 1122.774; found 1145.452 [M+H<sup>+</sup>+Na<sup>+</sup>], calcd 1145.762. Anal. Calcd for C<sub>70</sub>H<sub>38</sub>N<sub>4</sub>O<sub>8</sub>Ni C, 74.95; H, 3.41; N, 4.99. Found: C, 75.00; H, 3.42; N, 4.97.

**NiMBP(MN)<sub>2</sub>:** Yield: 65% (45 mg, 0.047 mmol). UV/vis (CH<sub>2</sub>Cl<sub>2</sub>):  $\lambda_{\max}$ (nm) (log  $\epsilon$ ): 277(4.40), 478(5.10), 599(4.07), 647(4.09). <sup>1</sup>H NMR (400 MHz, CDCl<sub>3</sub>)  $\delta$  (ppm): 9.26(d, <sup>3</sup>J<sub>H,H</sub> = 4 Hz, 2H,  $\beta$ -H), 8.69(d, <sup>3</sup>J<sub>H,H</sub> = 8 Hz, 2H,  $\beta$ -H), 8.48(d, <sup>3</sup>J<sub>H,H</sub> = 8 Hz, 2H, *meso*-Ph-H), 8.00(d, <sup>3</sup>J<sub>H,H</sub> = 8 Hz, 2H, *meso*-Ph-H), 7.87-7.70(m, 14H, *meso*-Ph-H), 7.22(s, 2H, fused-H), 3.87(s, 6H, -CH<sub>3</sub>). MALDI-TOF-MS (*m/z*): found 935.401 [M]<sup>+</sup>-CN calcd 935.179. Anal. Calcd for C<sub>58</sub>H<sub>30</sub>N<sub>8</sub>O<sub>4</sub>Ni•0.5CH<sub>3</sub>OH C, 71.87; H, 3.30; N, 11.46. Found: C, 71.90; H, 3.33; N, 11.39.

**Synthetic Procedure for NiMBC(IND)<sub>2</sub>Br<sub>4</sub>.** 120 mg (0.106 mmol) of NiMBC(IND)<sub>2</sub> was dissolved in 25 ml distilled chloroform. To this, 16 q. of liq. Br<sub>2</sub> (87  $\mu$ L, 1.7 mmol) dissolved in 10 ml of distilled CHCl<sub>3</sub> was added slowly. The resulted reaction mixture was stirred for 3-5 min at room temperature. The completeness of reaction was monitored by UV-vis spectroscopy with expected red shifts in the Soret and Q bands. After completion of reaction, the solution mixture was washed twice with 20% sodium metabisulphite (Na<sub>2</sub>S<sub>2</sub>O<sub>5</sub>) solution and the organic layer was separated and dried over anhydrous sodium sulphate. The solvent was removed to dryness and the crude porphyrin was purified by silica gel column chromatography using s chloroform eluent.

**NiMBC(IND)<sub>2</sub>Br<sub>4</sub>:** Yield: 80% (122 mg, 0.08 mmol). UV/vis (CH<sub>2</sub>Cl<sub>2</sub>):  $\lambda_{\max}$ (nm) (log  $\epsilon$ ): 230(5.05), 466(5.02), 549(3.85), 597(3.67), 650(sh), 706(4.60). <sup>1</sup>H NMR (400 MHz, CDCl<sub>3</sub>)  $\delta$ : 7.81-7.64(m, 13H, *meso*-Ph-H), 7.58-7.46(m, 5H, *meso*-Ph-H), 7.29-7.25(m, 3H, IND-H), 7.17-7.08(m, 3H, IND-H), 6.91(s, 2H, fused-H), 6.50(d, <sup>3</sup>J<sub>H,H</sub> = 8 Hz, 2H, IND-H), 5.29(d, <sup>3</sup>J<sub>H,H</sub> = 8 Hz, 2H,  $\beta$ -H), 3.84(d, <sup>3</sup>J<sub>H,H</sub> = 4 Hz, 6H, -CH<sub>3</sub>), 2.72(d, <sup>3</sup>J<sub>H,H</sub> = 8 Hz, 2H, -CH(IND)). MALDI-TOF-MS (*m/z*): found 1443.598 [M]<sup>+</sup> calcd 1443.398, found 1299.282 [M]<sup>+</sup>-IND calcd 1299.271. Anal. Calcd for C<sub>70</sub>H<sub>40</sub>Br<sub>4</sub>N<sub>4</sub>O<sub>8</sub>Ni C, 58.28; H, 2.79; N, 3.88. Found: C, 58.25; H, 2.80; N, 3.90.

**Synthesis of NiMBP(VCN)<sub>2</sub>:** 15 mg (0.016 mmol) of NiMBP(MN)<sub>2</sub> was dissolved in 5 mL distilled CHCl<sub>3</sub>. To this, 6 equivalents (25 mg, 0.094 mmol) of tetrabutylammonium cyanide (TBACN) was added and the reaction mixture was stirred for 30 minutes at room temperature under aerobic conditions. The progress of the reaction was monitored by TLC and UV-vis spectroscopy. After completion, the reaction mixture was washed twice with distilled water. The organic layer was separated and dried over anhydrous Na<sub>2</sub>SO<sub>4</sub> and evaporated to dryness. The crude porphyrin was purified by silica gel column chromatography using a chloroform eluent. The yield was found to be to 70% (10 mg, 0.011 mmol).

**NiMBP(VCN)<sub>2</sub>:** UV/vis (CH<sub>2</sub>Cl<sub>2</sub>):  $\lambda_{\text{max}}$ (nm) (log  $\epsilon$ ): 228(4.26), 326(3.80), 442(4.09), 520(3.89), 722(3.06), 780(2.30), 861(3.14). <sup>1</sup>H NMR (500 MHz, CDCl<sub>3</sub>)  $\delta$ : 9.96 (d, <sup>3</sup>J<sub>H,H</sub> = 5 Hz, 2H, fused-Ph-H), 8.74-8.72 (m, 4H, fused-Ph-H &  $\beta$ -H), 8.31 (d, <sup>3</sup>J<sub>H,H</sub> = 5 Hz, 2H,  $\beta$ -H), 7.97 (t, <sup>3</sup>J<sub>H,H</sub> = 10 Hz, 2H, fused-Ph-H), 7.88 (t, <sup>3</sup>J<sub>H,H</sub> = 10 Hz, 2H, fused-Ph-H), 7.79-7.72 (m, 10H, unfused *meso*-Ph-H) 6.94 (s, 2H, Benzo-H), 3.82 (s, 6H, -CH<sub>3</sub>). <sup>13</sup>C NMR (125 MHz, CDCl<sub>3</sub>)  $\delta$ : 168.1, 146.3, 139.5, 138.3, 138.0, 137.2, 137.0, 134.5, 132.1, 131.8, 130.9, 130.7, 129.8, 129.3, 129.1, 128.7, 127.8, 127.6, 126.5, 124.5, 117.2, 108.9, 107.7, 29.8. MALDI-TOF-MS (*m/z*): found 908.947 [M]<sup>+</sup> calcd 908.168.

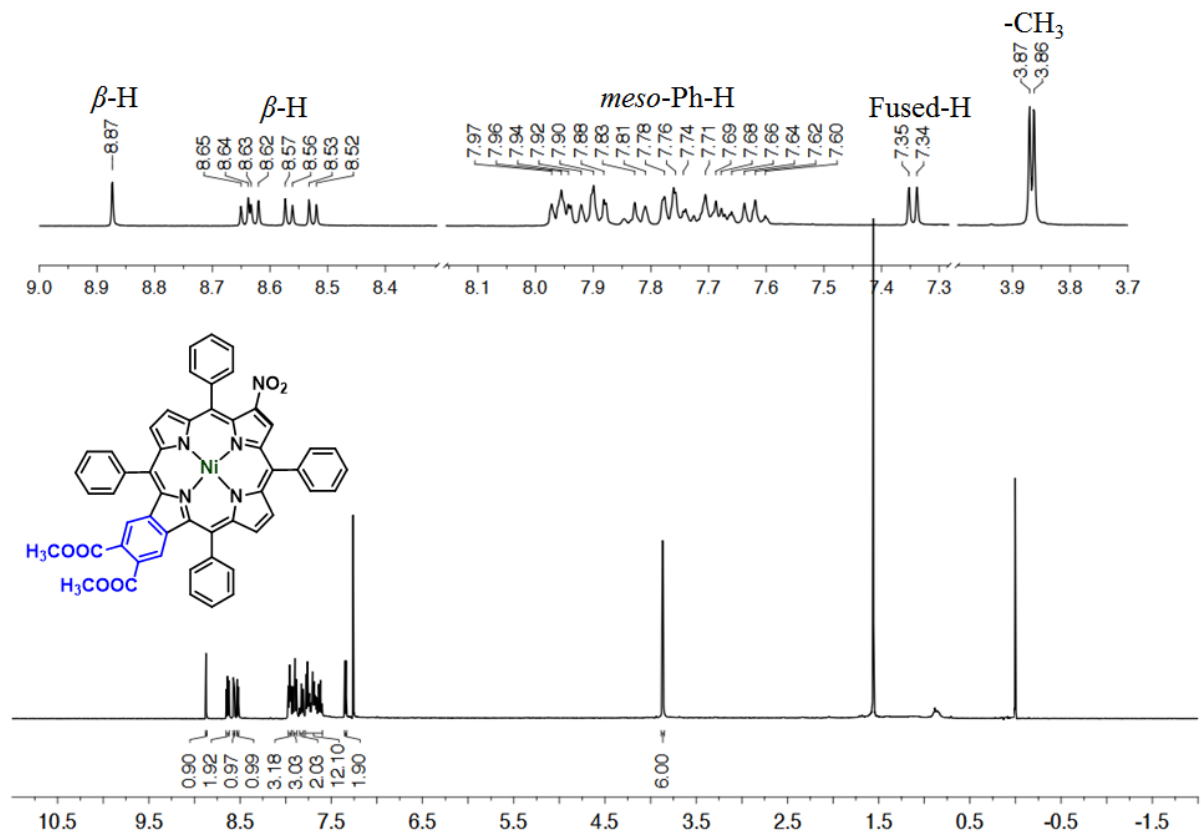

**Figure S1.**  $^1\text{H}$  NMR spectrum of NiMBP( $\text{NO}_2$ ) in  $\text{CDCl}_3$  at 298 K.

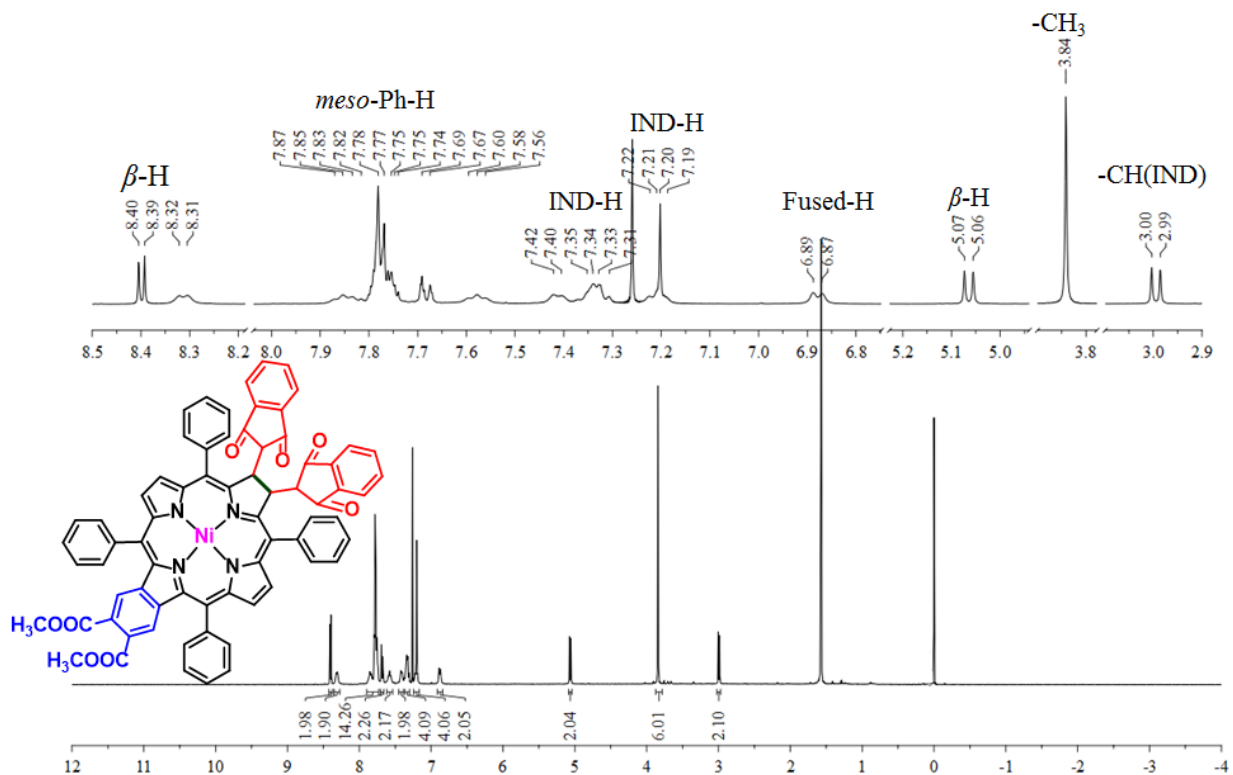

**Figure S2.**  $^1\text{H}$  NMR spectrum of  $\text{NiMBC(IND)}_2$  in  $\text{CDCl}_3$  at 298 K.

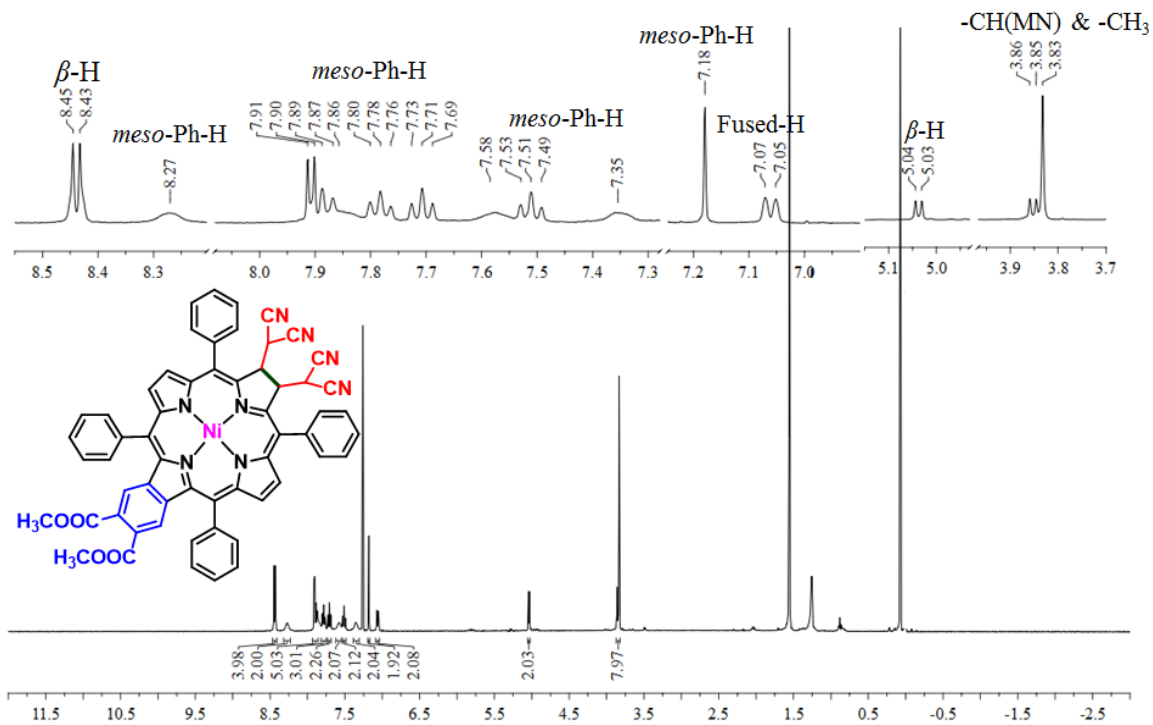

**Figure S3.**  $^1\text{H}$  NMR spectrum of  $\text{NiMBC(MN)}_2$  in  $\text{CDCl}_3$  at 298 K.

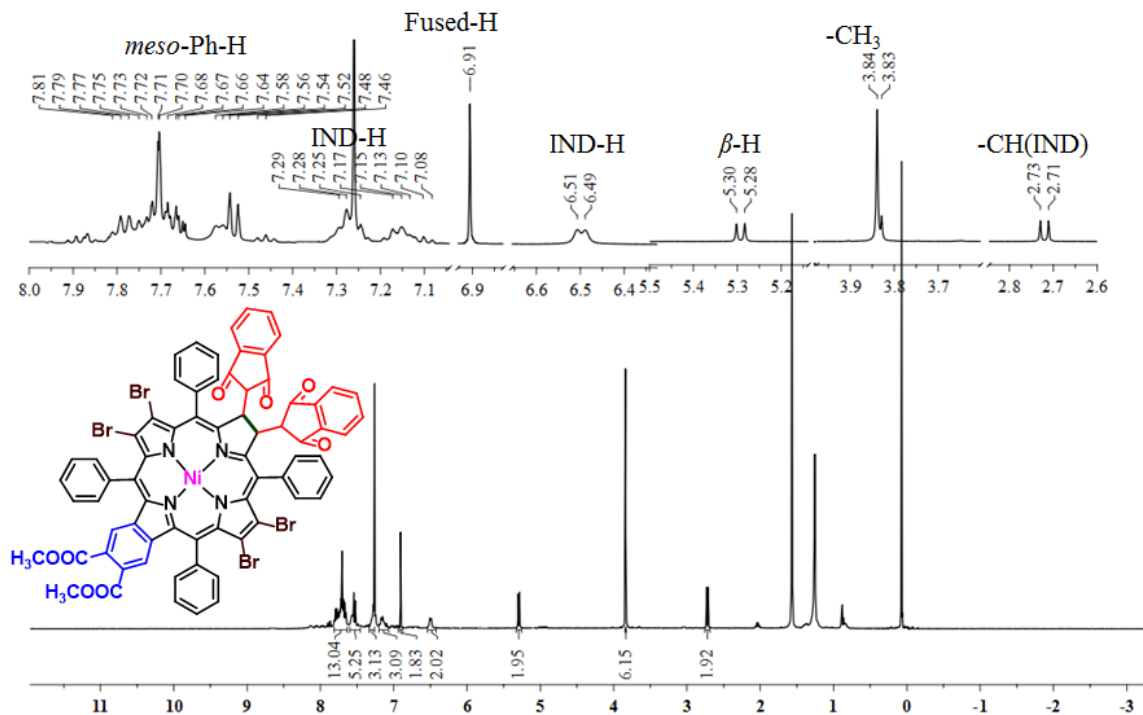

**Figure S4.** <sup>1</sup>H NMR spectrum of NiMBC(IND)<sub>2</sub>Br<sub>4</sub> in CDCl<sub>3</sub> at 298 K.

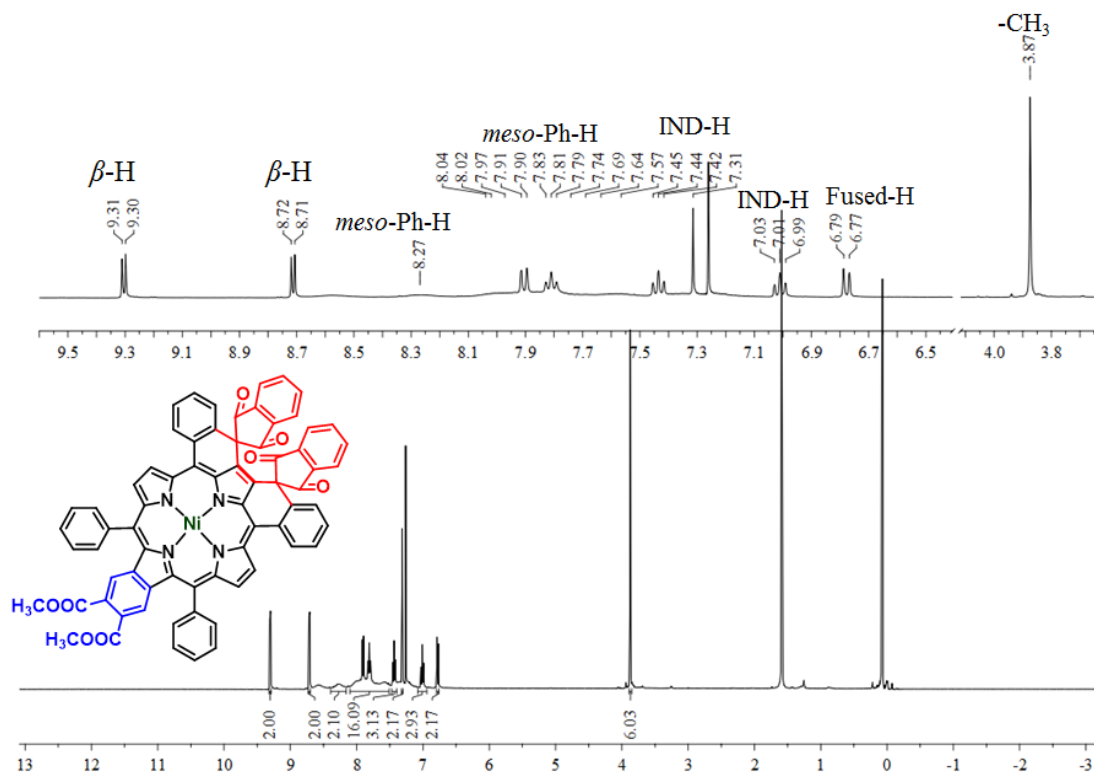

**Figure S5.** <sup>1</sup>H NMR spectrum of NiMBP(IND)<sub>2</sub> in CDCl<sub>3</sub> at 298 K.

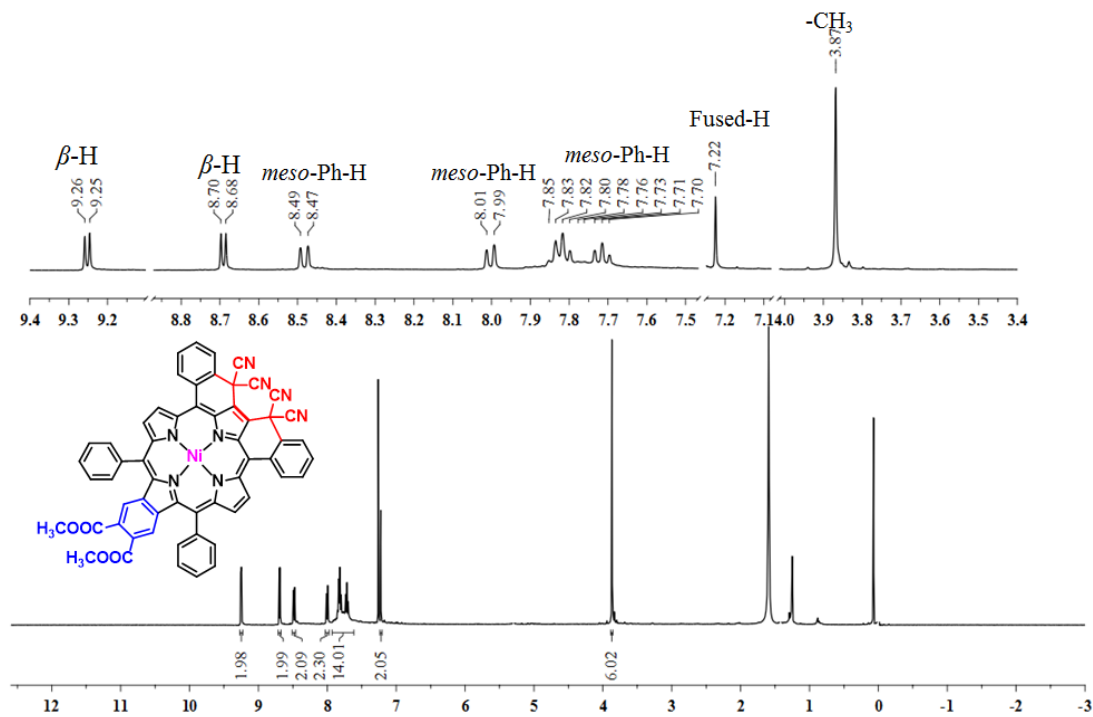

**Figure S6.**  $^1\text{H}$  NMR spectrum of  $\text{NiMBP}(\text{MN})_2$  in  $\text{CDCl}_3$  at 298 K.

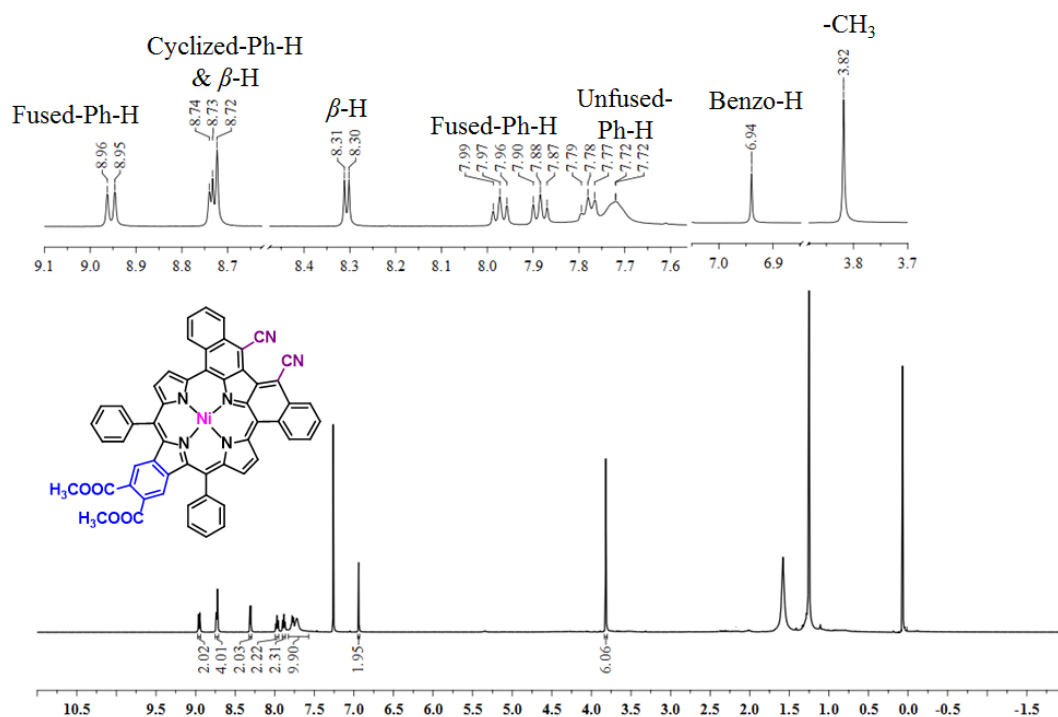

**Figure S7.**  $^1\text{H}$  NMR spectrum of  $\text{NiMBP}(\text{VCN})_2$  in  $\text{CDCl}_3$  at 298 K.

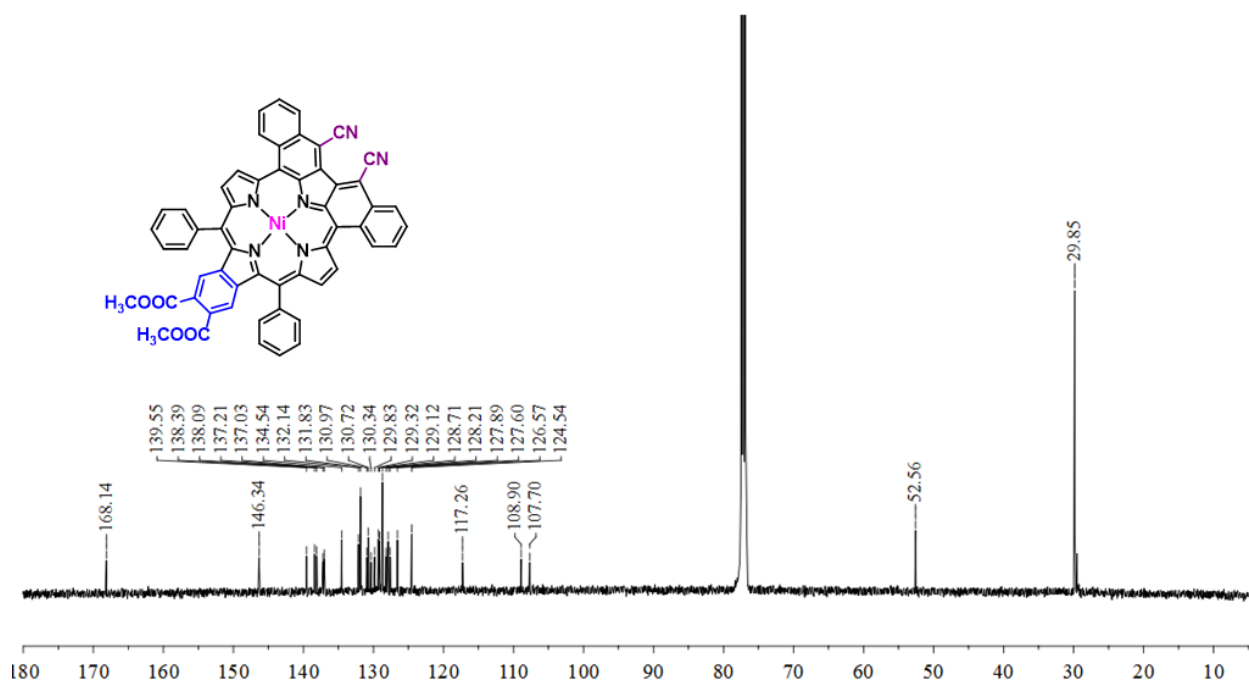

**Figure S8.** <sup>13</sup>C NMR spectrum of NiMBP(VCN)<sub>2</sub> in CDCl<sub>3</sub> at 298 K.

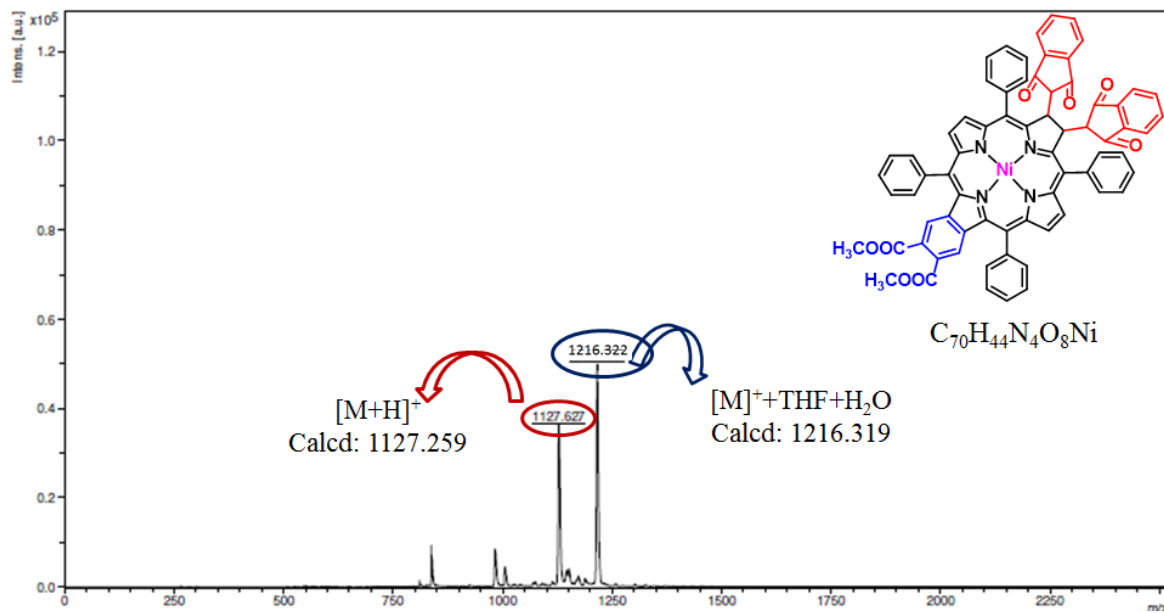

**Figure S9.** MALDI-TOF-MS spectrum of NiMBC(IND)<sub>2</sub> in CH<sub>2</sub>Cl<sub>2</sub> at 298 K.

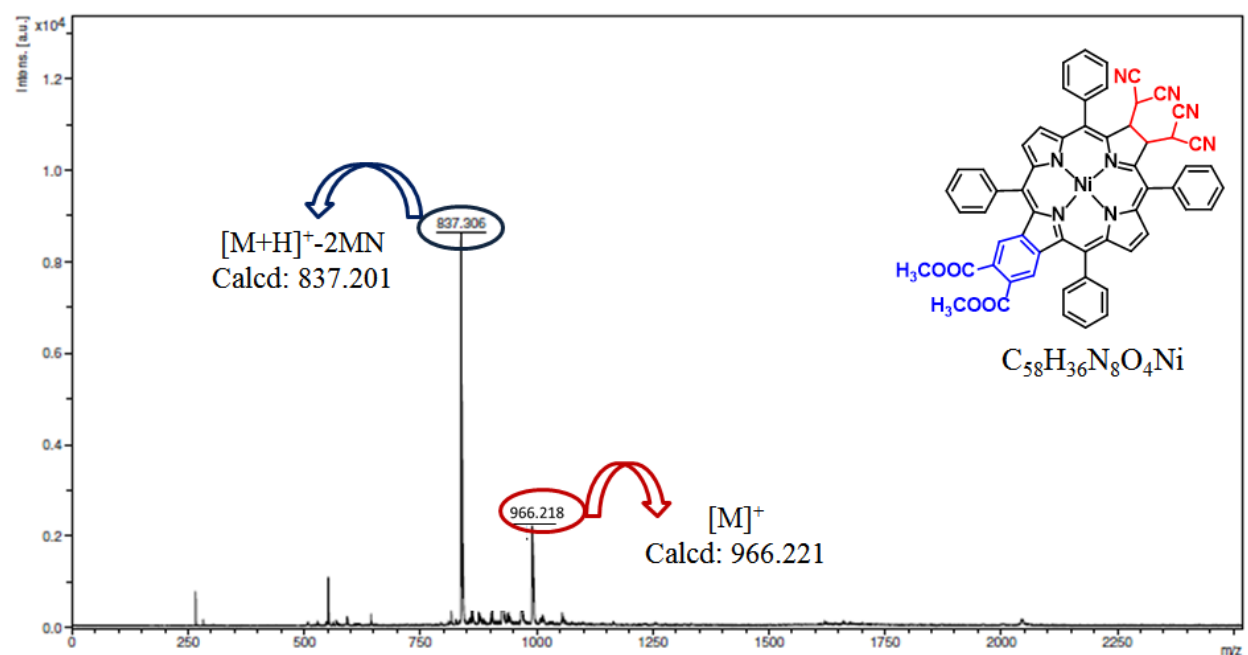

**Figure S10.** MALDI-TOF-MS spectrum of NiMBC(MN)<sub>2</sub> in CH<sub>2</sub>Cl<sub>2</sub> at 298 K.

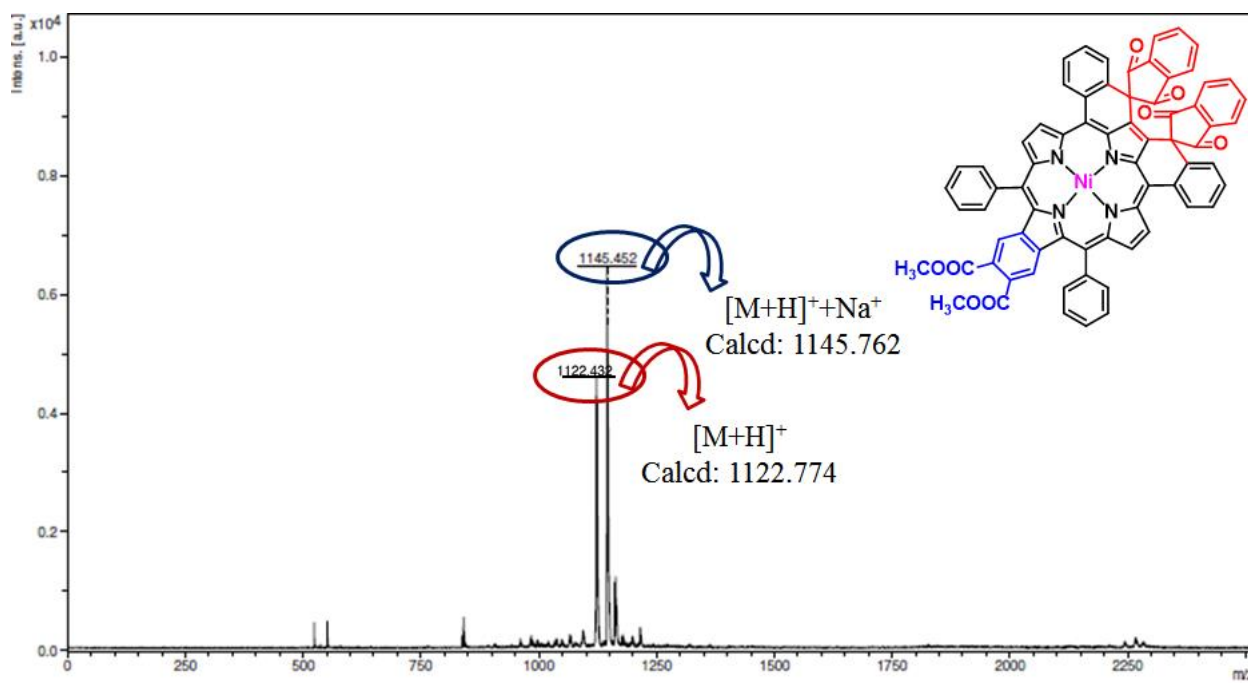

**Figure S11.** MALDI-TOF-MS spectrum of NiMBP(IND)<sub>2</sub> in CH<sub>2</sub>Cl<sub>2</sub> at 298 K.

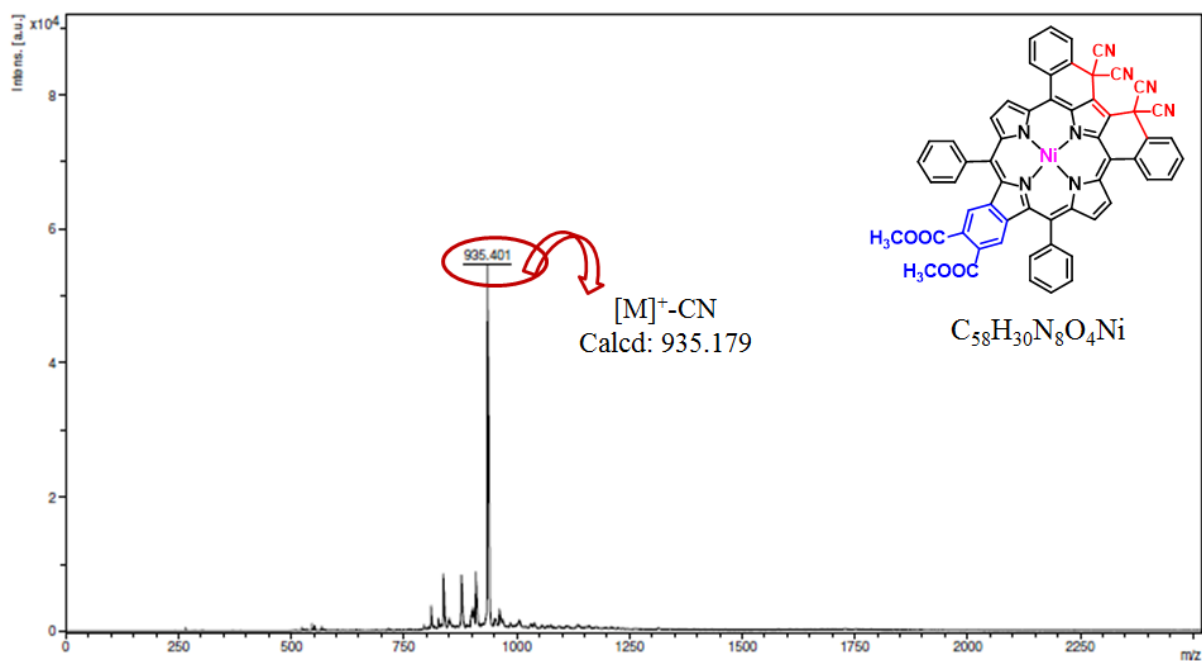

**Figure S12.** MALDI-TOF-MS spectrum of NiMBP(MN)<sub>2</sub> in CH<sub>2</sub>Cl<sub>2</sub> at 298 K.

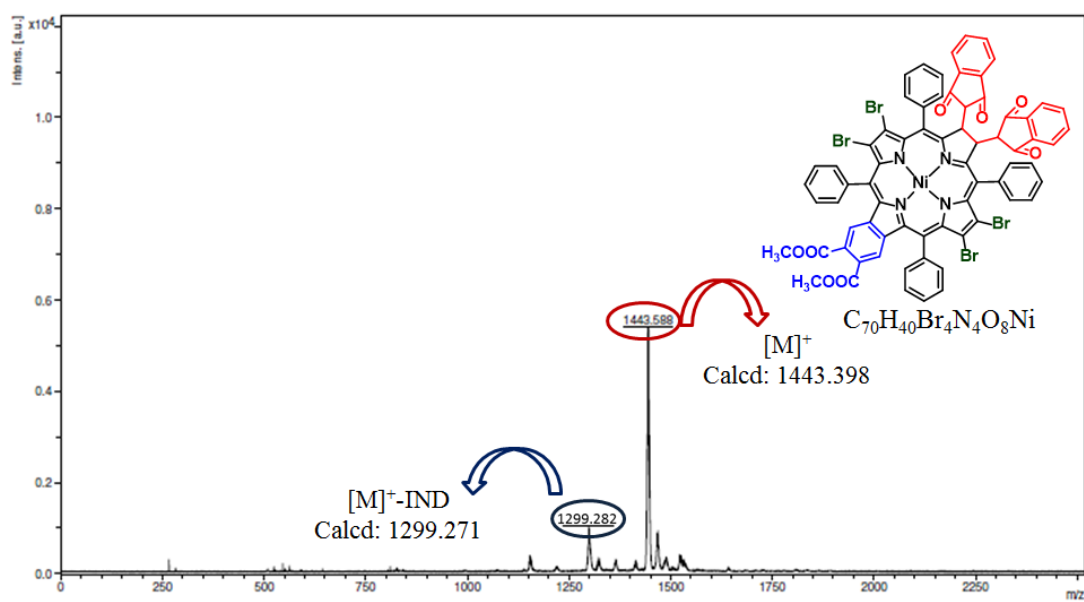

**Figure S13.** MALDI-TOF-MS spectrum of NiMBC(IND)<sub>2</sub>Br<sub>4</sub> in CH<sub>2</sub>Cl<sub>2</sub> at 298 K.

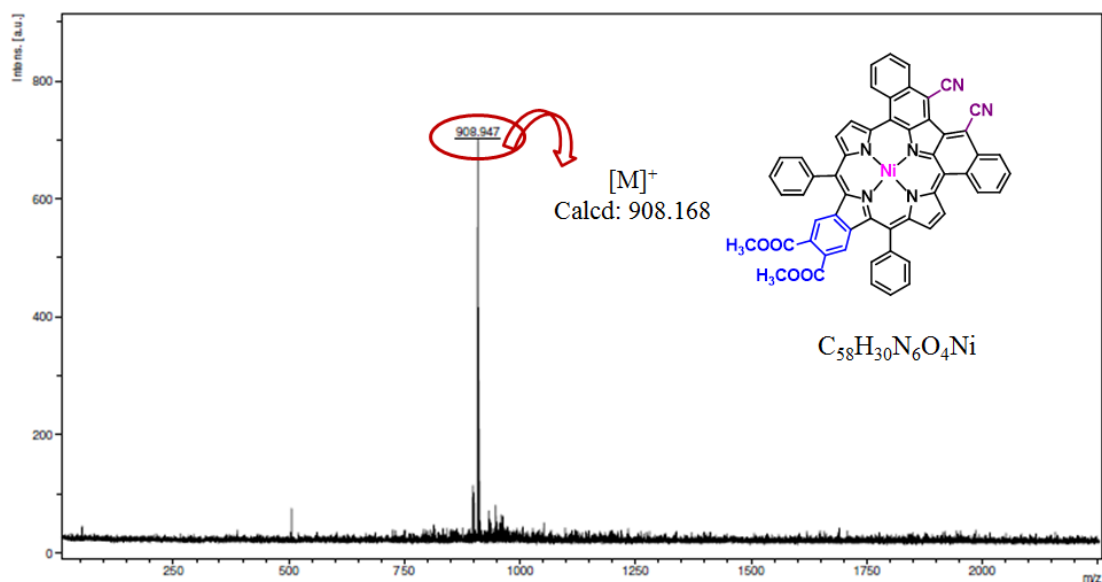

**Figure S14.** MALDI-TOF-MS spectrum of NiMBP(VCN)<sub>2</sub> in CH<sub>2</sub>Cl<sub>2</sub> at 298 K.

**Table S1.** Crystallographic and structure refinement data for NiMBP(IND)<sub>2</sub>.

|                                       |                                                                                    |
|---------------------------------------|------------------------------------------------------------------------------------|
| Formula                               | C <sub>70</sub> H <sub>38</sub> N <sub>4</sub> NiO <sub>8</sub> .CHCl <sub>3</sub> |
| Formula weight                        | 1241.12                                                                            |
| crystal system                        | Monoclinic                                                                         |
| space group                           | P2 <sub>1</sub> /c                                                                 |
| a (Å)                                 | 20.865(2)                                                                          |
| b (Å)                                 | 18.0617(19)                                                                        |
| c (Å)                                 | 14.9964(15)                                                                        |
| α, degrees                            | 90                                                                                 |
| β, degrees                            | 95.788(4)                                                                          |
| γ, degrees                            | 90                                                                                 |
| Volume (Å <sup>3</sup> )              | 5622.8(10)                                                                         |
| D <sub>calc</sub> , mg/m <sup>3</sup> | 1.466                                                                              |
| Z                                     | 4                                                                                  |
| crystal size, mm                      | 0.02×0.02×0.02                                                                     |
| λ (Mo Kα) Å                           | 0.71073                                                                            |
| temperature, K                        | 296 (2)                                                                            |
| data collection range, θ, deg.        | 3.303 to 25.558                                                                    |
| total reflections collected           | 13968                                                                              |
| independent reflections               | 8745                                                                               |
| quality-of-fit indicator              | 1.004                                                                              |
| final R indices [I > 2σ(I)]           | R1 = 0.0634, wR2 = 0.1785                                                          |
| R indices (all data)                  | R1 = 0.1125, wR2 = 0.2121                                                          |
| CCDC No.                              | 2101149                                                                            |

**Table S2.** Selected average bond lengths and bond angles of NiMBP(IND)<sub>2</sub> where (a) is a structure showing notation (b) is the structure showing distance of each atom from mean plane.

| 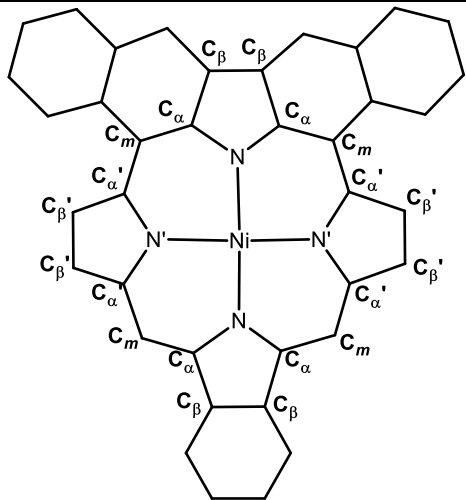 |              | 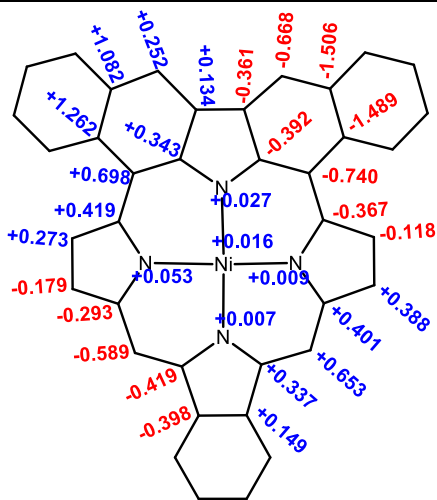 |           |
|-----------------------------------------------------------------------------------|--------------|------------------------------------------------------------------------------------|-----------|
| Bond Lengths (Å)                                                                  |              | Bond Angles (°)                                                                    |           |
| M-N                                                                               | 1.916 (3)    | N-M-N                                                                              | 179.3 (1) |
| M-N'                                                                              | 1.914 (3)    | N'-M-N'                                                                            | 178.5 (1) |
| N-C <sub>α</sub>                                                                  | 1.377 (4)    | M-N-C <sub>α</sub>                                                                 | 126.9 (2) |
| N'-C <sub>α</sub> '                                                               | 1.374 (4)    | M-N'-C <sub>α</sub> '                                                              | 127.1 (2) |
| C <sub>α</sub> -C <sub>β</sub>                                                    | 1.446 (5)    | N-C <sub>α</sub> -C <sub>m</sub>                                                   | 124.9 (3) |
| C <sub>α</sub> '-C <sub>β</sub> '                                                 | 1.434 (5)    | N'-C <sub>α</sub> '-C <sub>m</sub>                                                 | 125.0 (3) |
| C <sub>β</sub> -C <sub>β</sub>                                                    | 1.384 (5)    | N-C <sub>α</sub> -C <sub>β</sub>                                                   | 110.6 (3) |
| C <sub>β</sub> '-C <sub>β</sub> '                                                 | 1.344 (5)    | N'-C <sub>α</sub> '-C <sub>β</sub> '                                               | 109.9 (3) |
| C <sub>α</sub> -C <sub>m</sub>                                                    | 1.392 (4)    | C <sub>β</sub> -C <sub>α</sub> -C <sub>m</sub>                                     | 124.1 (3) |
| C <sub>α</sub> '-C <sub>m</sub>                                                   | 1.394 (5)    | C <sub>β</sub> '-C <sub>α</sub> '-C <sub>m</sub>                                   | 124.6 (3) |
| ΔC <sub>β</sub> <sup>a</sup>                                                      | <b>0.250</b> | C <sub>α</sub> -C <sub>β</sub> -C <sub>β</sub>                                     | 106.3 (3) |
| Δ24 <sup>b</sup>                                                                  | <b>0.323</b> | C <sub>α</sub> '-C <sub>β</sub> '-C <sub>β</sub> '                                 | 107.2 (3) |
| ΔNi                                                                               | <b>0.016</b> | C <sub>α</sub> -N-C <sub>α</sub>                                                   | 106.0 (3) |
|                                                                                   |              | C <sub>α</sub> '-N'-C <sub>α</sub> '                                               | 105.7 (3) |
|                                                                                   |              | C <sub>α</sub> -C <sub>m</sub> -C <sub>α</sub>                                     | 120.8 (3) |

<sup>a</sup>ΔC<sub>β</sub> refers to the mean plane deviation of β-pyrrole carbons  
<sup>b</sup>Δ24 refers to the mean plane displacement of 24-atom core

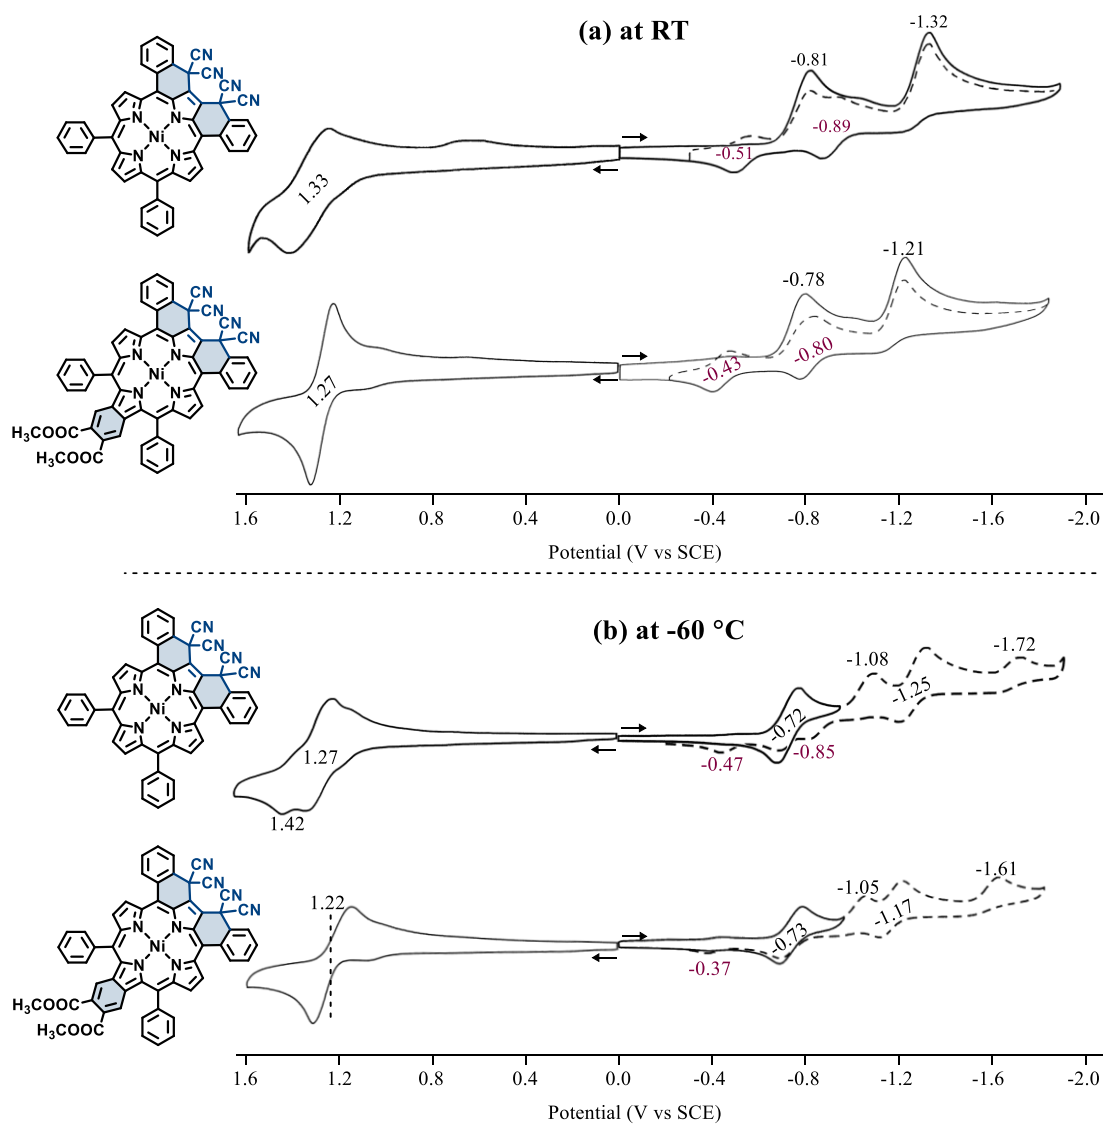

**Figure S15.** Cyclic voltammogram comparing the effect of  $\beta,\beta'$ -benzo fusion of NiTPP(MN)<sub>2</sub> and NiMBP(MN)<sub>2</sub> in CH<sub>2</sub>Cl<sub>2</sub> containing 0.1 M TBAP at (a) room temperature and (b) low temperature (-60 °C). Scan rate = 0.1 V/s.

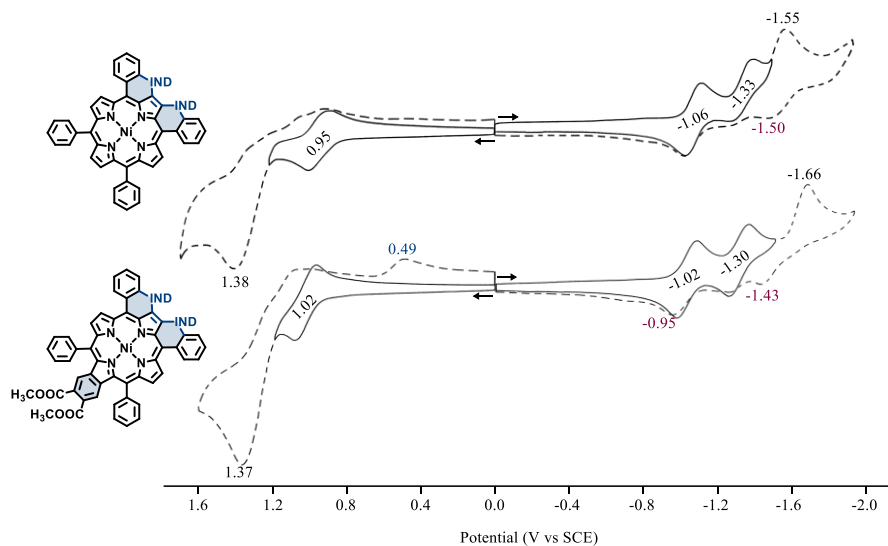

**Figure S16.** Cyclic voltammogram comparing the effect of  $\beta,\beta'$ -benzo fusion of NiTPP(IND)<sub>2</sub> and NiMBP(IND)<sub>2</sub> in CH<sub>2</sub>Cl<sub>2</sub> containing 0.1 M TBAP. Scan rate = 0.1 V/s.

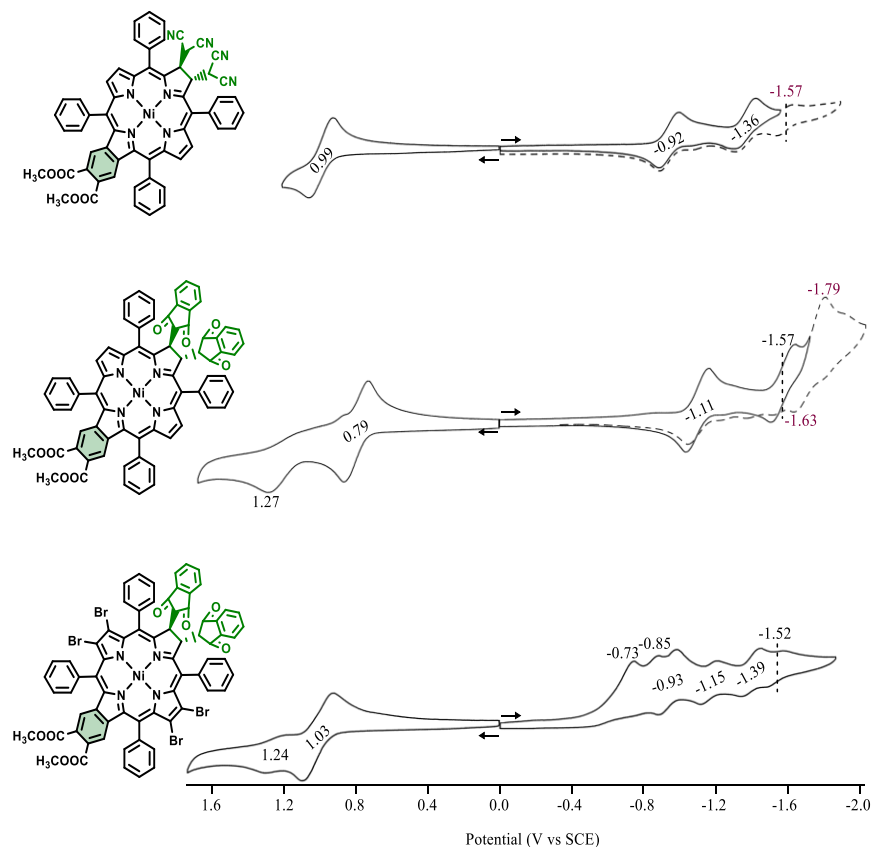

**Figure S17.** Cyclic voltammogram of NiMBC(MN)<sub>2</sub>, NiMBC(IND)<sub>2</sub> and NiMBC(IND)<sub>2</sub>Br<sub>4</sub> in CH<sub>2</sub>Cl<sub>2</sub> containing 0.1 M TBAP at low temperature (-60 °C). Scan rate = 0.1 V/s.

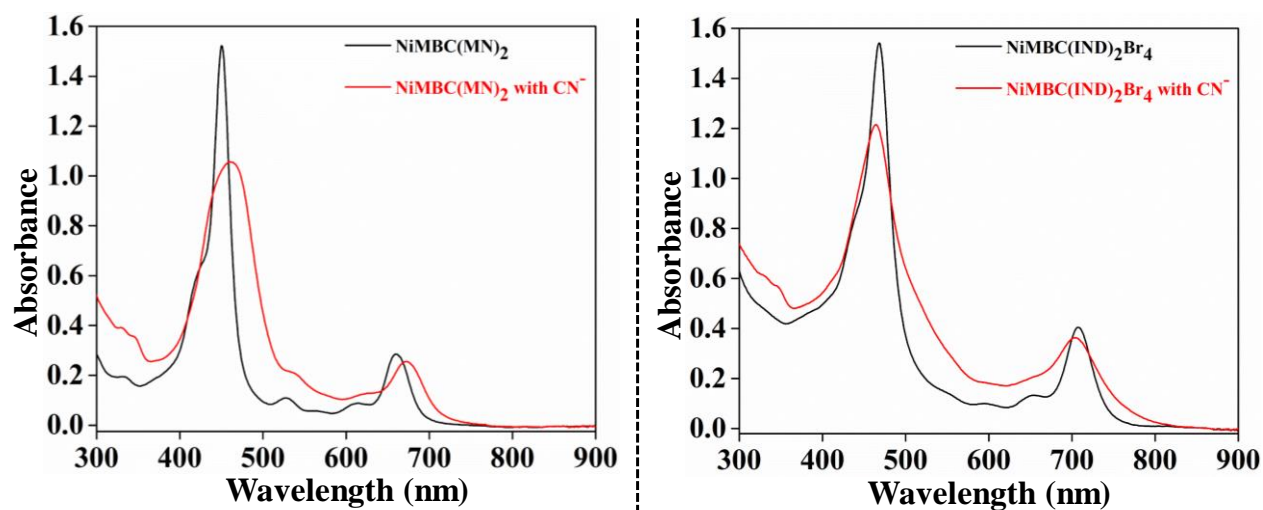

**Figure S18.** UV-Visible spectral changes of (a) NiMBC(MN)<sub>2</sub> with CN<sup>-</sup> ion; (b) NiMBC(IND)<sub>2</sub>Br<sub>4</sub> with cyanide ion in CH<sub>2</sub>Cl<sub>2</sub> at 298 K.

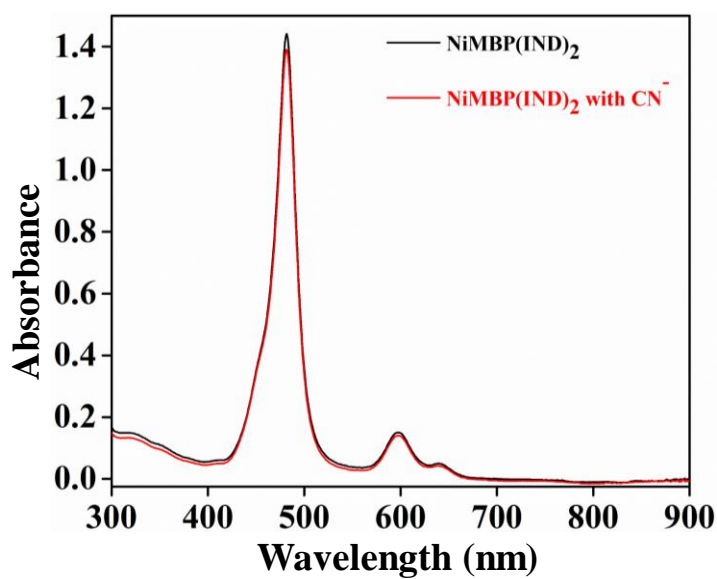

**Figure S19.** Comparative UV-visible spectra of NiMBP(IND)<sub>2</sub> with and without cyanide ions in CH<sub>2</sub>Cl<sub>2</sub> at 298 K. The concentration of CN<sup>-</sup> anions range from 0 to  $1.12 \times 10^{-3}$  M.

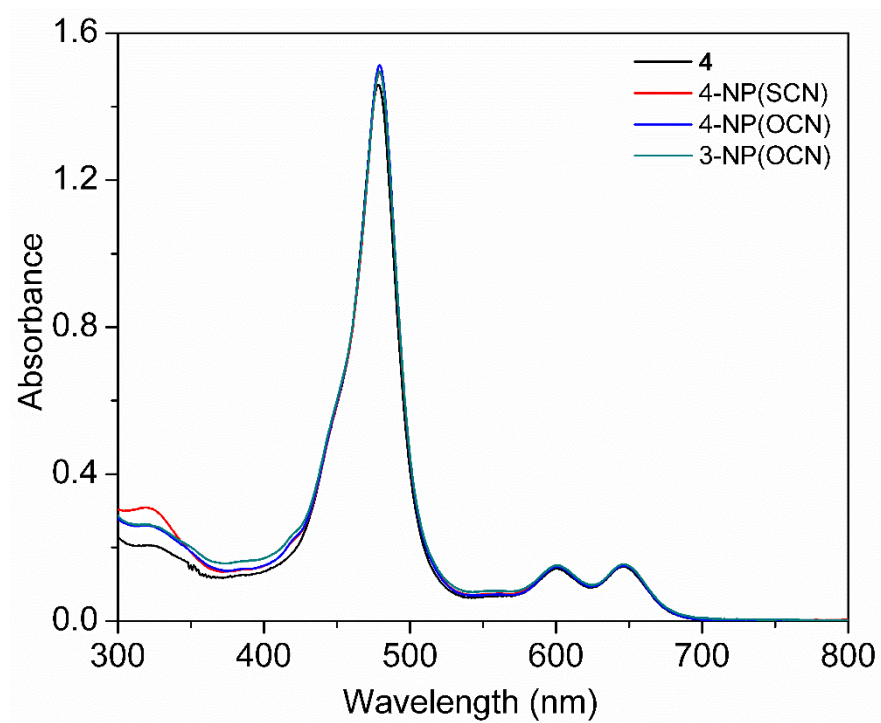

**Figure S20.** UV-Vis Spectral Changes of NiMBP(MN)<sub>2</sub> ( $1.08 \times 10^{-5}$  M) upon Addition of 10 eq. of Tested Isocyanate and Isothiocyanate derivatives in CH<sub>2</sub>Cl<sub>2</sub> 298 K.

### Detection Limit

Detection limits of NiMBP(MN)<sub>2</sub> in CH<sub>2</sub>Cl<sub>2</sub> were obtained according to the reported literature method.<sup>1</sup> NiMBP(MN)<sub>2</sub> was dissolved in CH<sub>2</sub>Cl<sub>2</sub> ( $1.08 \times 10^{-5}$  M) and the absorbance changes during the titration with CN<sup>-</sup> ions (from 0 to 119 μM). Figure S21 shows a plot of the  $\log(A_n - A_0)/(A_f - A_n)$  versus  $\log[\text{CN}^-]$ ; where  $A_n$  = absorbance at after each addition of n aliquots of CN<sup>-</sup> ions,  $A_0$  = absorbance of NiMBP(MN)<sub>2</sub> without CN<sup>-</sup> ions (reference conc.),  $A_f$  = absorbance at addition of final aliquot of CN<sup>-</sup> ions. A linear regression curve was fitted to the plot and the x-intercept axis shows the lowest concentrations of [CN<sup>-</sup>] which can be detected for the respective compound (*i.e.* LOD in mol/L)

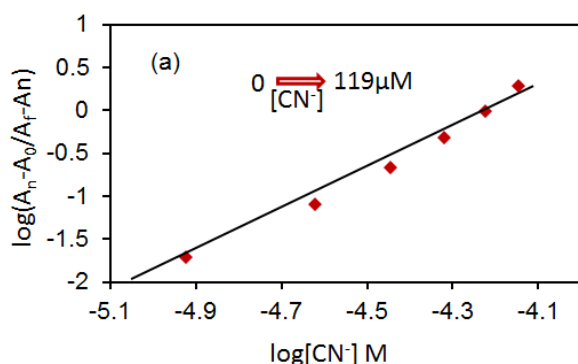

**Figure S21.** Plot of  $\log(A_n - A_0)/(A_f - A_n)$  versus  $\log[\text{CN}^-]$  to determine the limit of detection for NiMBP(MN)<sub>2</sub> in CH<sub>2</sub>Cl<sub>2</sub>.

For the plot above, the x-Intercept is  $\log(-5.08)$ . Antilog of this gives us the molar conc. *i.e.*  $8.31 \times 10^{-6}$  mol/L. Thus, multiplying this value with molecular weight of TBACN (268.5 g/mol) gives the actual limit of detection (LOD) value. Thus the LOD for non-aqueous media is 2.23 mg/L (2.23 ppm).

### References.

1. Shortreed, M.; Kopelman, R.; Kuhn, M.; Hoyland, B., Fluorescent Fiber-Optic Calcium Sensor for Physiological Measurements. *Anal. Chem.* **1996**, 68, 1414-1418.
